# Supplementary material for: The overexpression of peroxiredoxin-4 affects the progression of idiopathic pulmonary fibrosis
Source: Springer Nature journal article supplement (doi:10.1186/s12890-019-1032-2), 2019-12-01

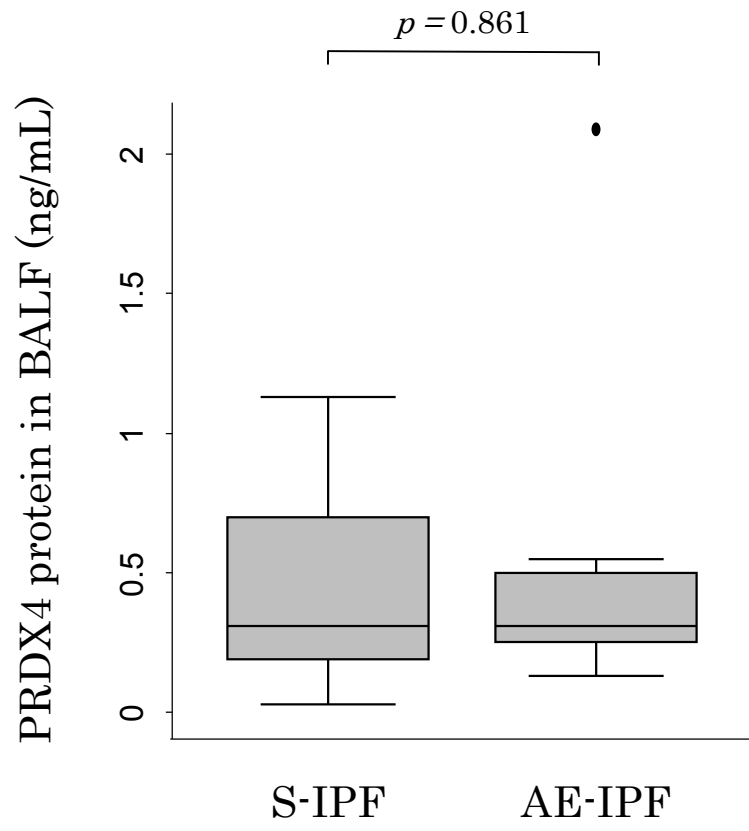

Supplement: MOESM1 [file 17661292]
